# Supplementary material
Source: MDPI journal article supplement (https://www.mdpi.com/2073-4433/13/6/994)
Supplement: s1 [file s1]

# Supplementary Materials: Long-Term Variations of Meteorological and Precursor Influences on Ground Ozone Concentrations in Jinan, North China Plain, from 2010 to 2020

Jing Sun <sup>1</sup>, Shixin Duan <sup>1</sup>, Baolin Wang <sup>1</sup>, Lei Sun <sup>1</sup>, Chuanyong Zhu <sup>1</sup>, Guolan Fan <sup>2</sup>, Xiaoyan Sun <sup>2</sup>, Zhiyong Xia <sup>2</sup>, Bo Lv <sup>2</sup>, Jiaying Yang <sup>1</sup> and Chen Wang <sup>1,\*</sup>

<sup>1</sup> School of Environmental Science and Engineering, Qilu University of Technology (Shandong Academy of Sciences), Jinan 250300, China; jingsunok@163.com (J.S.); duanshixin1997@163.com (S.D.); wangbaolin@qlu.edu.cn (B.W.); sunlei@qlu.edu.cn (L.S.); zchychina@163.com (C.Z.); yjiaying2001@163.com (J.Y.)

<sup>2</sup> Shandong Provincial Jinan Eco-environment Monitoring Center, Jinan 250102, China; fanguolan@126.com (G.F.); xiaoyan\_sun1983@126.com (X.S.); xiazy109423@163.com (Z.X.); lvbo0531@163.com (B.L.)

\* Correspondence: wangchen@qlu.edu.cn

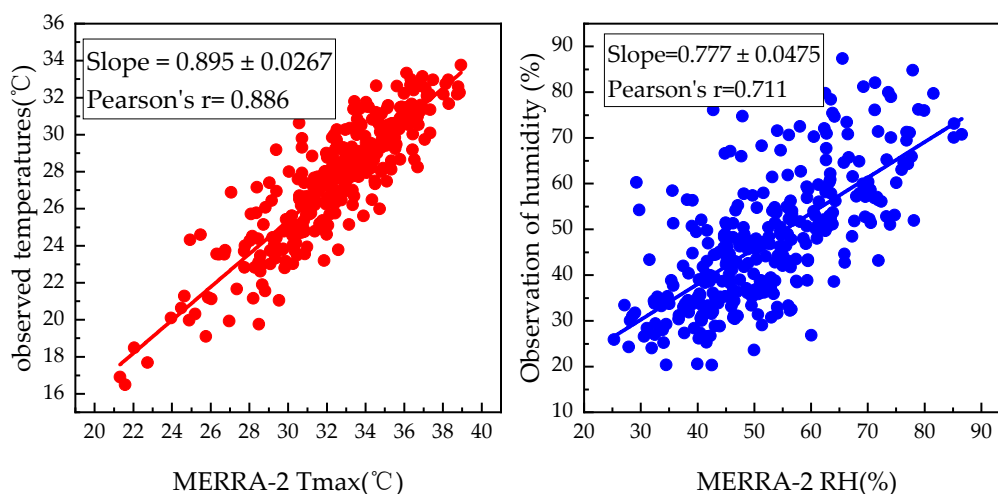

**Figure S1.** Validation of MERRA-2 data by meteorological data from ground observations in June 2020.

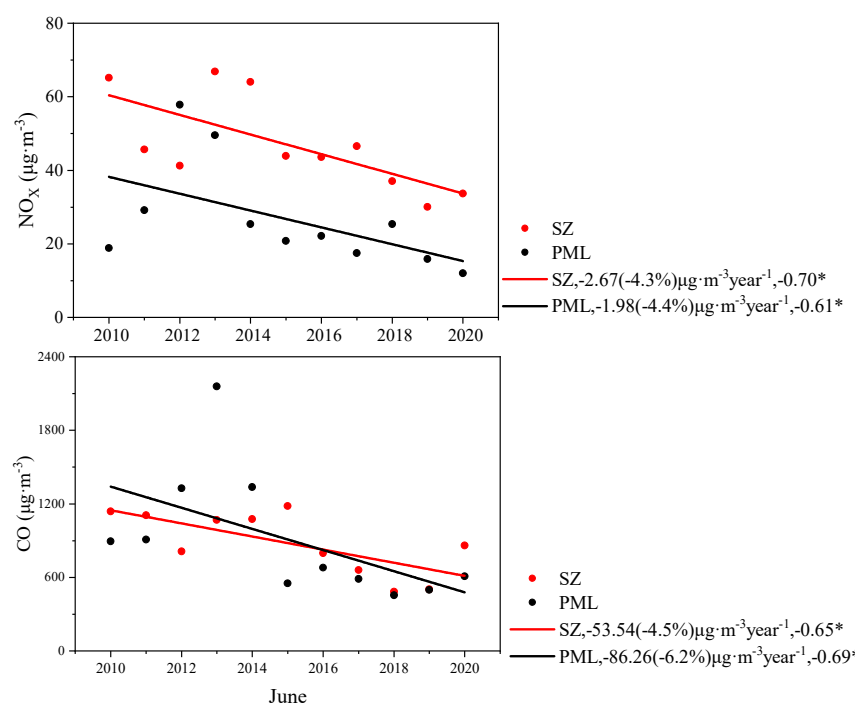

**Figure S2.** Ground-based observations of trends in  $\text{NO}_x$  and  $\text{CO}$ . \*indicates that the requirement of significance was reached ( $p < 0.05$ ).

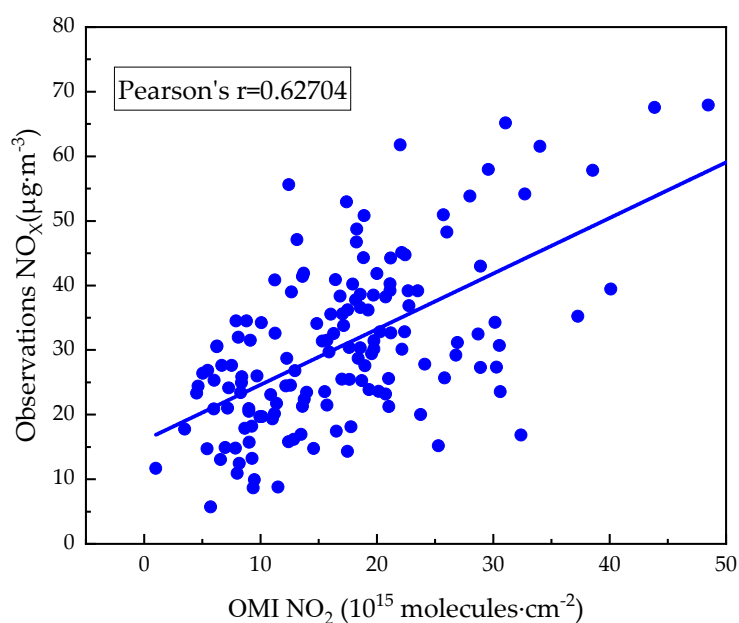

**Figure S3.** Validation of ground-observed  $\text{NO}_x$  against satellite  $\text{NO}_2$ .
